# Supplementary material for: Invasive Species as Rivals: Invasive Potential and Distribution Pattern of Xanthium strumarium L.
Source: MDPI journal article supplement (doi:10.3390/su14127141), 2022-06-10
Supplement: s1 [file s1]

## Supplementary Data

**Table S1.** Indices of phytosociological attributes for fifty plant species in the four clusters of *X. strumarium* dominated communities. Values are means (mean importance values ( $\pm$  SE) of the importance values obtained from the relative scores of frequency, density and cover data. The symbol (hyphen –) refer to species absent in a particular group.

| S. No | Plant Name                                  | Group I                          | Group II                         | Group III                        | Group IV                         | Overall                          |
|-------|---------------------------------------------|----------------------------------|----------------------------------|----------------------------------|----------------------------------|----------------------------------|
| 1     | <i>Xanthium strumarium</i> L.               | <b>39.76<math>\pm</math>1.42</b> | <b>45.48<math>\pm</math>0.94</b> | <b>47.05<math>\pm</math>2.30</b> | <b>50.93<math>\pm</math>3.00</b> | <b>45.33<math>\pm</math>0.98</b> |
| 2     | <i>Cannabis sativa</i> L.                   | <b>12.94<math>\pm</math>1.14</b> | <b>12.37<math>\pm</math>0.74</b> | 3.01 $\pm$ 0.99                  | <b>18.22<math>\pm</math>3.01</b> | <b>11.89<math>\pm</math>0.96</b> |
| 3     | <i>Parthenium hysterosporus</i> L.          | <b>6.15<math>\pm</math>1.05</b>  | <b>13.61<math>\pm</math>0.88</b> | 2.89 $\pm$ 1.18                  | 2.56 $\pm$ 1.05                  | <b>7.91<math>\pm</math>0.88</b>  |
| 4     | <i>Datura innoxia</i> L.                    | 1.04 $\pm$ 0.02                  | -                                | <b>4.63<math>\pm</math>1.61</b>  | <b>9.78<math>\pm</math>3.07</b>  | <b>5.14<math>\pm</math>0.90</b>  |
| 5     | <i>Sanchus asper</i> L.                     | 0.37 $\pm$ 0.37                  | 0.93 $\pm$ 0.45                  | -                                | 0.82 $\pm$ 0.82                  | 0.60 $\pm$ 0.24                  |
| 6     | <i>Verbascum thapsus</i> L.                 | -                                | 0.18 $\pm$ 0.18                  | -                                | <b>5.29<math>\pm</math>2.15</b>  | 0.94 $\pm$ 0.44                  |
| 7     | <i>Erigeron canadensis</i> (L.) Cronq.      | 1.55 $\pm$ 0.64                  | 1.65 $\pm$ 0.95                  | 1.66 $\pm$ 1.15                  | -                                | 1.30 $\pm$ 0.45                  |
| 8     | <i>Capsella bursaa pestoris</i> (L.) Medik  | -                                | 1.61 $\pm$ 0.78                  | -                                | -                                | 0.62 $\pm$ 0.31                  |
| 9     | <i>Trifolium repens</i> L.                  | -                                | 2.64 $\pm$ 1.11                  | -                                | -                                | 1.05 $\pm$ 0.47                  |
| 10    | <i>Calotropis procera</i> (Aiton) W.T.Aiton | 0.33 $\pm$ 0.33                  | 0.60 $\pm$ 0.41                  | -                                | 1.16 $\pm$ 1.16                  | 0.52 $\pm$ 0.27                  |
| 11    | <i>Chenopodium album</i> L.                 | <b>7.22<math>\pm</math>1.36</b>  | <b>4.66<math>\pm</math>0.98</b>  | 2.68 $\pm$ 1.12                  |                                  | <b>4.11<math>\pm</math>0.65</b>  |
| 12    | <i>Amaranthus viridis</i> L.                | 4.43 $\pm$ 1.78                  | 3.71 $\pm$ 0.76                  | 2.31 $\pm$ 1.02                  | 1.12 $\pm$ 0.73                  | 3.18 $\pm$ 0.58                  |
| 13    | <i>Lipidium sativa</i> L.                   | -                                | 0.77 $\pm$ 0.42                  | 0.89 $\pm$ 0.58                  | 1.42 $\pm$ 1.42                  | 0.72 $\pm$ 0.31                  |
| 14    | <i>Persicaria maculosa</i> S.F.Gray         | 0.87 $\pm$ 0.87                  | 3.61 $\pm$ 1.09                  | 2.30 $\pm$ 1.59                  | -                                | 2.07 $\pm$ 0.58                  |
| 15    | <i>Justicia adhatoda</i> L.                 | -                                | 0.59 $\pm$ 0.59                  | -                                | 1.26 $\pm$ 1.26                  | 0.47 $\pm$ 0.33                  |
| 16    | <i>Taraxicum officinale</i> Weber           | 0.67 $\pm$ 0.67                  | 0.77 $\pm$ 0.54                  | -                                | 0.60 $\pm$ 0.60                  | 0.58 $\pm$ 0.28                  |
| 17    | <i>Brassica campestris</i> L.               | -                                | -                                | 1.88 $\pm$ 1.09                  | 0.54 $\pm$ 0.54                  | 0.43 $\pm$ 0.23                  |
| 18    | <i>Eclipta alba</i> L.                      | -                                | 0.43 $\pm$ 0.43                  | 0.71 $\pm$ 0.71                  | -                                | 0.30 $\pm$ 0.21                  |
| 19    | <i>Alternanthera pungens</i> Kunth          | 1.46 $\pm$ 0.87                  | 0.60 $\pm$ 0.33                  | 0.49 $\pm$ 0.49                  | -                                | 0.68 $\pm$ 0.26                  |
| 20    | <i>Eryngium coereculum</i> M-Bieb.          | -                                | -                                | 1.38 $\pm$ 1.01                  | -                                | 0.24 $\pm$ 0.18                  |
| 21    | <i>Amarathus spinosus</i> L.                | -                                | -                                | 1.26 $\pm$ 0.83                  | -                                | 0.23 $\pm$ 0.16                  |
| 22    | <i>Dysphania ambrosioides</i> L.            | 0.35 $\pm$ 0.35                  | 0.19 $\pm$ 0.19                  | 2.69 $\pm$ 1.54                  | -                                | 0.64 $\pm$ 0.31                  |
| 23    | <i>Chrozophora tinctoria</i> (L.) Raf.      | -                                | -                                | 1.09 $\pm$ 0.72                  | -                                | 0.19 $\pm$ 0.13                  |
| 24    | <i>Tribulus terrestris</i> L.               | 2.18 $\pm$ 1.72                  | -                                | 0.28 $\pm$ 0.28                  | -                                | 0.58 $\pm$ 0.43                  |
| 25    | <i>Polygonum aviculare</i> L.               | -                                | -                                | 0.46 $\pm$ 0.46                  | -                                | 0.083 $\pm$ 0.083                |
| 26    | <i>Heliotropium curassavicum</i> L.         | 1.03 $\pm$ 1.03                  | -                                | 0.29 $\pm$ 0.29                  | -                                | 0.30 $\pm$ 0.25                  |

|    |                                                    |                  |           |           |           |                  |
|----|----------------------------------------------------|------------------|-----------|-----------|-----------|------------------|
| 27 | <i>Helianthus annuus</i> L.                        | 0.26±0.26        | -         | -         | -         | 0.064±0.064      |
| 28 | <i>Mirabilis jalapa</i> L.                         | 1.14±1.14        | 0.28±0.28 | -         | -         | 0.39±0.29        |
| 29 | <i>Centaurea cyanus</i> L.                         | 0.73±0.73        | -         | -         | -         | 0.17±0.17        |
| 30 | <i>Tagetes erectus</i> L.                          | -                | -         | 4.08±3.02 | -         | 0.72±0.56        |
| 31 | <i>Carthamus oxycantha</i> Bieb                    | 2.03±0.87        | 0.28±0.28 | 5.15±2.27 | 0.55±0.55 | 1.62±0.53        |
| 32 | <i>Cirsium arvense</i> (L.) Scop.                  | -                | -         | 1.39±0.93 | -         | 0.24±0.17        |
| 33 | <i>Utrica dioica</i> L.                            | -                | 0.47±0.32 | -         | -         | 0.18±0.13        |
| 34 | <i>Oxalis corniculata</i> L.                       | -                | 0.18±0.18 | -         | -         | 0.073±0.07       |
| 35 | <i>Zea mays</i> L.                                 | -                | 0.21±0.21 | -         | -         | 0.087±0.087      |
| 36 | <i>Silybum marianum</i> (L.) Geartn                | 3.90±1.29        | 0.45±0.45 | 4.80±2.39 | 0.46±0.46 | 2.073±0.61       |
| 37 | <i>Cyprus rotundus</i> L.                          | -                | 0.83±0.41 | -         | 0.33±0.33 | 0.39±0.18        |
| 38 | <i>Echornia cresipes</i> (Mart.) Solma in DC       | 0.81±0.81        | -         | -         | -         | 0.20±0.20        |
| 39 | <i>Brossentia papyrifera</i> (L.) L'Herit. ex Vent | 1.00±0.68        | -         | 0.33±0.33 | -         | 0.30±0.18        |
| 40 | <i>Cucurbita pepo</i> L.                           | 0.41±0.41        | -         | -         | -         | 0.10±0.10        |
| 41 | <i>Solanum nigrum</i> L                            | 0.62±0.42        | -         | 0.45±0.45 | 0.44±0.44 | 0.31±0.15        |
| 42 | <i>Trianthema portulacastrum</i> L.                | 0.46±0.46        | -         | -         | -         | 0.11±0.11        |
| 43 | <i>Prosopis julifolia</i> (Sw.) DC.                | -                | 0.32±0.32 | -         | -         | 0.12±0.12        |
| 44 | <i>Mentha longifolia</i> L.                        | -                | 0.34±0.34 | -         | -         | 0.13±0.13        |
| 45 | <i>Acacia nilotica</i> Willd.                      | -                | 0.29±0.29 | 0.57±0.67 | -         | 0.22±0.15        |
| 46 | <i>Physalis minima</i> L.                          | 0.73±0.49        | -         | -         | -         | 0.18±0.12        |
| 47 | <i>Cassia occidentalis</i> L.                      | 0.73±0.49        | -         | -         | -         | 0.18±0.12        |
| 48 | <i>Achyranthus aspera</i> L.                       | 0.51±0.51        | -         | -         | -         | 0.12±0.12        |
| 49 | <i>cynodon dactylon</i> (L.) Pers.                 | <b>6.36±1.70</b> | 2.07±0.82 | -         | 2.11±1,04 | <b>3.74±0.70</b> |
| 50 | <i>Tagetes minuta</i> L.                           | -                | -         | -         | 2.98±2.98 | 0.53±0.53        |

**Table S2:** Taxonomic, ecological and phyto-geographical details of plant species associated with *X. strumarium* in Khyber Pakhtunkhwa, Pakistan.

| S.No | SC   | Plant Name                                  | Local Name                 | English name                   | H   | sp | F     | M/D | L   | NC       |
|------|------|---------------------------------------------|----------------------------|--------------------------------|-----|----|-------|-----|-----|----------|
| 1    | XaSt | <i>Xanthium strumarium</i> L.               | Geshke/Jeshke/ Ghana       | Clothbur/ Cocklebur            | A   | I  | Ast   | D   | H   | NA       |
| 2    | CaSt | <i>Cannabis sativa</i> L.                   | Bhang / Merijwana          | Hemp                           | A   | I  | Can   | D   | H   | CA       |
| 3    | PaHy | <i>Parthenium hysterosporus</i> L.          | Carrot grass/ Gandhi booti | White top/ Congress grass      | A   | I  | Ast   | D   | H   | NCA      |
| 4    | DM   | <i>Datura innoxia</i> L.                    | Dhatura                    | Thorn apple                    | A/B | I  | Sol   | D   | H   | CUSA     |
| 5    | SA   | <i>Sonchus asper</i> (L.) Hill              | Shawda pae                 | Prickly Sow Thistle            | A   | I  | Ast   | D   | H   | E        |
| 6    | VT   | <i>Verbascum thapsus</i> L.                 | Khar Gwag                  | Jangli Tamak/ Sfaid bhang      | B   | N  | Scrop | D   | H   | ES       |
| 7    | EC   | <i>Erigeron canadensis</i> (L.) Cronq.      | Maloch                     | horseweed/butterweed           | A   | N  | Ast   | D   | H   | CAN      |
| 8    | CBP  | <i>Capsella bursaa pectoris</i> (L.) Medik  | Bambaisa/Bibi Painsa       | shepherd's purse               | A   | I  | Br    | D   | H   | E        |
| 9    | TR   | <i>Trifolium repens</i> L.                  | Shawtal/Shaftal            | white clover/Dutch clover      | P   | I  | Fab   | D   | H   | E        |
| 10   | CP   | <i>Calotropis procera</i> (Aiton) W.T.Aiton | Spalmai                    | apple of Sodom/ rubber bush    | P   | N  | Ap    | D   | S   | A        |
| 11   | ChAl | <i>Chenopodium album</i> L.                 | Sarme                      | goose foot                     | A   | N  | Am    | D   | H   | EA       |
| 12   | AV   | <i>Amaranthus viridis</i> L.                | Chalwaye                   | green amaranth                 | A   | I  | Am    | D   | H   | SA       |
| 13   | LS   | <i>Lipidium sativa</i> L.                   | Cress                      | garden cress                   | A   | Cl | Br    | D   | H   | EWA      |
| 14   | PM   | <i>Persicaria maculosa</i> S.F.Gray         | Soor Palpulak              | lady's thumb                   | A   | N  | Poly  | D   | H   | AE       |
| 15   | JA   | <i>Justicia adhatoda</i> L.                 | Baikarh                    | Malabar nut/adulsa             | P   | N  | Ac    | D   | H   | P        |
| 16   | TO   | <i>Taraxicum officinale</i> Weber           | Peryan dolae/boda bodai    | common dandelion               | P   | Nt | Ast   | D   | H   | E        |
| 17   | BC   | <i>Brassica campestris</i> L.               | Sharhsham/Sarson           | Mustard                        | A   | I  | Br    | D   | H   | E        |
| 18   | EA   | <i>Eclipta alba</i> L.                      | ----                       | false daisy                    | P   | I  | Ast   | D   | H   | SA       |
| 19   | AP   | <i>Alternanthera pungens</i> Kunth          | Khaki Boti                 | Joyweed                        | A   | I  | Am    | D   | H   | TA       |
| 20   | EC   | <i>Eryngium coereculum</i> M-Bieb.          | Manzari panja              | eryngo/amethyst sea holly      | A/P | N  | Ap    | D   | H   | TA       |
| 21   | AS   | <i>Amarathus spinosus</i> L.                | Ganharh                    | spiny pigweed/prickly amaranth | A   | I  | Am    | D   | H   | SA       |
| 22   | DA   | <i>Dysphania ambrosioides</i> L.            | Binnakai                   | worm seed/ Maxican tea         | A/P | N  | Am    | D   | H   | CA/ SA   |
| 23   | CT   | <i>Chrozophora tinctoria</i> (L.) Raf.      | -----                      | dye's croton/turnsole          | A/P | N  | Eup   | D   | H/S | I/Pk/ CA |
| 24   | TT   | <i>Tribulus terrestris</i> L.               | Markundai                  | cat's-head/devil's eyelashes   | A   | Nt | Zyg   | D   | H   | Pt       |
| 25   | PA   | <i>Polygonum aviculare</i> L.               | Bandakai                   | prostrate knotweed             | A   | N  | Poly  | D   | H   | ErNA     |
| 26   | HC   | <i>Heliotropium curassavicum</i> L.         | Wasnal                     | salt heliotrope                | P   | Nt | B     | D   | H   | SA       |
| 27   | HA   | <i>Helianthus annus</i> L.                  | Nwar paras                 | Sun flower                     | P   | C  | Ast   | D   | H   | NA       |
| 28   | MJ   | <i>Mirabilis jalapa</i> L.                  | Gul bada                   | Japanese 4 'o' clock           | P   | Nt | Nyc   | D   | H   | SA       |
| 29   | CeC  | <i>Centaurea cyanus</i> L.                  | Gul Tokna/Neeli Botle      | cornflower/bachelor's button   | A   | Nt | Ast   | D   | H   | E        |

|    |    |                                                    |                     |                               |   |    |      |   |     |      |
|----|----|----------------------------------------------------|---------------------|-------------------------------|---|----|------|---|-----|------|
| 30 | TE | <i>Tagetes erectus</i> L.                          | Damber gwle/ Hmesha | Mexican marigold              | A | Cl | Ast  | D | H   | SA   |
| 31 | CO | <i>Carthamus oxycantha</i> Bieb                    | Kareza/Pohli        | distaff thistles              | A | Nt | Ast  | D | H   | Er   |
| 32 | CA | <i>Cirsium arvense</i> (L.) Scop.                  | Kandai              | creeping thistle              | P | N  | Ast  | D | H   | E/NA |
| 33 | UD | <i>Urtica dioica</i> L.                            | Sezonki/Jalbang     | common/stinging nettle        | P | N  | Urt  | D | H   | E    |
| 34 | OC | <i>Oxalis corniculata</i> L.                       | Taroke/Manzaken     | yellow sorrel/sleeping beauty | P | Nt | Oxal | D | H   | E    |
| 35 | ZM | <i>Zea mays</i> L.                                 | Jwar                | Maiz                          | A | Cl | P    | M | S   | SA   |
| 36 | SM | <i>Silybum marianum</i> (L.) Geartn                | Wrojakai            | Milk thistle/Mary thistle     | A | I  | Ast  | D | H   | E    |
| 37 | CR | <i>Cyprus rotundus</i> L.                          | Wakha               | Java grass/purple nut sedge   | P | I  | Cyp  | M | H   | Pt   |
| 38 | EC | <i>Eichornia crsipes</i> (Mart.) Solma in DC       | gul-e-bakauli       | common water hyacinth         | P | I  | Pont | M | H   | SA   |
| 39 | BP | <i>Brossentia papyrifera</i> (L.) L'Herit. ex Vent | Gul toot            | Paper mulberry                | P | I  | M    | D | T   | SEA  |
| 40 | CP | <i>Cucurbita pepo</i> L.                           | Kadu                | Pumpkin                       | A | Cl | Cuc  | D | V   | SA   |
| 41 | SN | <i>Solanum nigrum</i> L.                           | Kachmcho            | Black nightshade              | A | Nt | Sol  | D | H   | M    |
| 42 | TP | <i>Trianthema portulacastrum</i> L.                | -----               | black/giant pigweed           | A | I  | Aiz  | D | H   | TA   |
| 43 | PJ | <i>Prosopis julifolia</i> (Sw.) DC.                | Kabali kekar        | Aippia                        | P | I  | Fab  | D | S/T | N/SA |
| 44 | ML | <i>Mentha longifolia</i> L.                        | Wenale              | horse mint                    | P | Cl | Lam  | D | H   | E    |
| 45 | AN | <i>Acacia nilotica</i> Willd.                      | Kekar               | gum arabic tree/babul         | P | Nt | Fab  | D | T   | M    |
| 46 | PM | <i>Physalis minima</i> L.                          | Mangote             | gooseberry/wild cape          | A | N  | Sol  | D | H   | A/Np |
| 47 | CA | <i>Cassia occidentalis</i> L.                      | Kasondi             | septic weed/coffee senna      | A | I  | Caes | D | S   | SA   |
| 48 | AA | <i>Achyranthus aspera</i> L.                       | Jishkay             | chaff-prickly/chaff flower    | A | N  | Am   | D | H   | SA   |
| 49 | CD | <i>Cynodon dactylon</i> (L.) Pers.                 | Kabal               | Grass/og's tooth grass        | P | N  | P    | M | H   | Pt   |
| 50 | TM | <i>Tagetes minuta</i> L.                           | Hamesha             | wild marigold/black mint      | A | I  | Ast  | D | H   | A    |

**Note:** H: Habit, A: Annual, B: Biennial, P: Perennial, SP: Status in Pakistan, I: Invasive, Nt: Naturalized, N: Native, C: Casual, Cl: Cultivated, F: Family, Ast: Asteraceae, Can: Cannabaceae, Sol: Solanaceae, Scrop: Scrophulariaceae, Fab: Fabaceae, Br: Brassicaceae, Ap: Apocyanaceae, Am: Amaranthaceae, Pol: Polygonaceae, Ac: Acanthaceae, Ap: Apiaceae, Eup: Euhorbiaceae, Zyg: Zygophyllaceae, Oxal: Oxalidaceae, P: Poaceae, Cyp: Cypereaceae, Pont: Pontederiaceae, M: Moraceae, Cuc: Cucurbitaceae, Aiz: Aizoaceae, Lam: Lamiaceae, Caes: Caesalpinaceae, NC: Native Country, NA: North America, CA: Central Asia, NCA: North Central America, CUSA: Central United State of America, E: Europ, Er: Euroasia, CAN: Central and North America, A: Africa, EA: Eastern Asia, SA: South America, EWA: Egypt and Western Asia, AE: Asia and Europ, P: Panama, TA: Tropical America, CA/SA: Central America/South America, I/Pk/CA: India/Pakistan/Central Asia, Pt: Panetropical, ErNA: Euroasia and North America, E/NA: Europ/ North Asia, SEA: South East Asia, M: Midterrenian, Afg/Np: Afghanistan/Nepal.

**Table S3.** Correlation coefficients among different environmental variables influencing the distribution of *X. strumarium* in Khyber Pakhtunkhwa, Pakistan.

|            | Elev         | N°           | E°          | AA    | Cl%          | Si%          | Sa%          | P1:5        | OM%          | OC%          | L %          | TC%          | N           | P           | K     | EC    |
|------------|--------------|--------------|-------------|-------|--------------|--------------|--------------|-------------|--------------|--------------|--------------|--------------|-------------|-------------|-------|-------|
| Elev       | 1            |              |             |       |              |              |              |             |              |              |              |              |             |             |       |       |
| N°         | 0.17         | 1.00         |             |       |              |              |              |             |              |              |              |              |             |             |       |       |
| E°         | <b>0.54</b>  | -0.09        | 1.00        |       |              |              |              |             |              |              |              |              |             |             |       |       |
| AA         | -0.05        | -0.06        | 0.01        | 1.00  |              |              |              |             |              |              |              |              |             |             |       |       |
| Cl%        | 0.17         | -0.09        | 0.20        | 0.12  | 1.00         |              |              |             |              |              |              |              |             |             |       |       |
| Si%        | -0.31        | -0.09        | -0.08       | -0.06 | <b>-0.47</b> | 1.00         |              |             |              |              |              |              |             |             |       |       |
| Sa%        | 0.22         | 0.17         | -0.07       | -0.02 | -0.22        | <b>-0.76</b> | 1.00         |             |              |              |              |              |             |             |       |       |
| P1:5       | 0.06         | <b>-0.40</b> | 0.13        | -0.05 | 0.28         | -0.23        | 0.05         | 1.00        |              |              |              |              |             |             |       |       |
| OM%        | <b>0.49</b>  | 0.10         | <b>0.36</b> | 0.08  | <b>0.43</b>  | <b>-0.32</b> | 0.03         | 0.08        | 1.00         |              |              |              |             |             |       |       |
| OC%        | <b>0.49</b>  | 0.10         | <b>0.36</b> | 0.08  | <b>0.43</b>  | <b>-0.32</b> | 0.03         | 0.08        | 1.00         | 1.00         |              |              |             |             |       |       |
| L %        | <b>-0.48</b> | -0.02        | -0.04       | -0.24 | -0.27        | <b>0.60</b>  | <b>-0.46</b> | -0.17       | -0.27        | -0.27        | 1.00         |              |             |             |       |       |
| TC%        | <b>0.49</b>  | 0.10         | <b>0.36</b> | 0.08  | <b>0.43</b>  | <b>-0.32</b> | 0.03         | 0.08        | <b>1.00</b>  | 1.00         | -0.27        | 1.00         |             |             |       |       |
| N          | <b>0.35</b>  | 0.14         | 0.05        | 0.27  | 0.06         | -0.22        | 0.19         | 0.04        | <b>0.39</b>  | <b>0.39</b>  | -0.22        | <b>0.39</b>  | 1.00        |             |       |       |
| P          | 0.16         | 0.28         | -0.03       | -0.27 | -0.07        | -0.09        | 0.15         | -0.05       | 0.05         | 0.05         | -0.09        | 0.05         | 0.10        | 1.00        |       |       |
| K          | -0.20        | 0.24         | 0.14        | 0.05  | -0.02        | 0.17         | -0.16        | -0.03       | -0.13        | -0.13        | 0.29         | -0.13        | -0.01       | 0.25        | 1.00  |       |
| EC         | 0.29         | 0.15         | 0.08        | -0.09 | 0.01         | 0.10         | -0.13        | 0.03        | 0.10         | 0.10         | -0.12        | 0.10         | <b>0.31</b> | <b>0.36</b> | 0.13  | 1.00  |
| TDS        | 0.29         | 0.15         | 0.08        | -0.09 | 0.01         | 0.10         | -0.13        | 0.03        | 0.10         | 0.10         | -0.12        | 0.10         | <b>0.31</b> | <b>0.36</b> | 0.13  | 1.00  |
| WP         | 0.17         | -0.10        | 0.21        | 0.10  | <b>0.99</b>  | -0.47        | -0.21        | 0.29        | <b>0.42</b>  | <b>0.42</b>  | -0.24        | <b>0.42</b>  | 0.06        | -0.05       | -0.02 | 0.02  |
| FC         | 0.03         | -0.16        | 0.20        | 0.07  | <b>0.89</b>  | -0.03        | <b>-0.63</b> | 0.21        | <b>0.32</b>  | <b>0.32</b>  | 0.02         | <b>0.32</b>  | -0.04       | -0.12       | 0.06  | 0.06  |
| D          | -0.05        | 0.12         | -0.15       | -0.15 | <b>-0.91</b> | 0.10         | <b>0.56</b>  | -0.22       | <b>-0.35</b> | <b>-0.35</b> | 0.09         | <b>-0.35</b> | 0.01        | 0.13        | -0.03 | -0.07 |
| SP         | 0.05         | -0.12        | 0.15        | 0.15  | <b>0.90</b>  | -0.10        | <b>-0.56</b> | 0.22        | <b>0.35</b>  | <b>0.35</b>  | -0.09        | <b>0.35</b>  | -0.01       | -0.13       | 0.03  | 0.07  |
| AW         | <b>-0.31</b> | -0.16        | -0.03       | -0.03 | -0.20        | <b>0.95</b>  | <b>-0.90</b> | -0.14       | -0.22        | -0.22        | <b>0.59</b>  | -0.22        | -0.25       | -0.18       | 0.14  | 0.07  |
| XaSt (IVI) | 0.25         | -0.04        | 0.15        | -0.07 | 0.00         | 0.19         | -0.21        | 0.16        | 0.08         | 0.08         | -0.21        | 0.08         | -0.06       | -0.02       | -0.04 | 0.05  |
| XaSt(D/Ha) | 0.28         | 0.02         | -0.09       | 0.00  | -0.04        | -0.19        | 0.24         | 0.03        | <b>0.30</b>  | <b>0.30</b>  | <b>-0.43</b> | <b>0.30</b>  | 0.04        | 0.18        | -0.16 | 0.05  |
| XaSt(A.D)  | 0.25         | 0.08         | -0.20       | -0.07 | -0.04        | -0.07        | 0.10         | 0.15        | 0.04         | 0.04         | <b>-0.37</b> | 0.04         | -0.12       | -0.03       | -0.25 | 0.05  |
| XaSt(C/Ha) | 0.00         | -0.28        | -0.08       | -0.02 | -0.09        | 0.02         | 0.04         | 0.02        | 0.08         | 0.08         | <b>-0.30</b> | 0.08         | -0.03       | 0.12        | 0.01  | -0.07 |
| XaSt (A.C) | 0.06         | -0.08        | -0.22       | -0.10 | -0.11        | 0.09         | -0.02        | 0.09        | -0.07        | -0.07        | -0.26        | -0.07        | -0.17       | -0.04       | -0.14 | -0.07 |
| XaSt(V/Ha) | -0.10        | -0.28        | -0.02       | -0.02 | 0.01         | 0.04         | -0.05        | -0.04       | 0.10         | 0.10         | -0.06        | 0.10         | -0.07       | -0.05       | -0.01 | -0.15 |
| XaSt(A.V)  | -0.03        | -0.14        | -0.20       | -0.12 | -0.12        | 0.19         | -0.12        | 0.01        | -0.09        | -0.09        | -0.12        | -0.09        | -0.17       | -0.10       | -0.07 | -0.20 |
| (H/)       | -0.39        | -0.23        | -0.21       | -0.01 | 0.03         | -0.07        | 0.05         | -0.02       | -0.18        | -0.18        | 0.17         | -0.18        | -0.10       | -0.10       | 0.00  | -0.03 |
| (J)        | -0.08        | -0.14        | 0.20        | 0.05  | 0.08         | 0.00         | -0.06        | -0.07       | -0.18        | -0.18        | 0.23         | -0.18        | -0.07       | -0.12       | 0.06  | -0.03 |
|            | TDS          | WP           | FC          | D     | SP           | AW           | XaSt (IVI)   | XaSt (D/Ha) | XaSt (A.D)   | XaSt (C/Ha)  | XaSt (A.C)   | XaSt (V/Ha)  | XaSt (A.V)  | (H/)        | (J)   |       |
| TDS        | 1.00         |              |             |       |              |              |              |             |              |              |              |              |             |             |       |       |

|            |       |              |              |              |       |       |              |              |              |              |              |             |              |             |      |
|------------|-------|--------------|--------------|--------------|-------|-------|--------------|--------------|--------------|--------------|--------------|-------------|--------------|-------------|------|
| WP         | 0.02  | 1.00         |              |              |       |       |              |              |              |              |              |             |              |             |      |
| FC         | 0.06  | <b>0.89</b>  | 1.00         |              |       |       |              |              |              |              |              |             |              |             |      |
| D          | -0.07 | <b>-0.88</b> | <b>-0.95</b> | 1.00         |       |       |              |              |              |              |              |             |              |             |      |
| SP         | 0.07  | <b>0.88</b>  | <b>0.95</b>  | <b>-1.00</b> | 1.00  |       |              |              |              |              |              |             |              |             |      |
| AW         | 0.07  | -0.20        | 0.25         | -0.19        | 0.19  | 1.00  |              |              |              |              |              |             |              |             |      |
| XaSt (IVI) | 0.05  | -0.02        | 0.09         | -0.11        | 0.11  | 0.24  | 1.00         |              |              |              |              |             |              |             |      |
| XaSt(D/Ha) | 0.05  | -0.05        | -0.15        | 0.09         | -0.09 | -0.20 | <b>0.42</b>  | 1.00         |              |              |              |             |              |             |      |
| XaSt(A.D)  | 0.05  | -0.06        | -0.09        | 0.03         | -0.03 | -0.04 | <b>0.52</b>  | <b>0.69</b>  | 1.00         |              |              |             |              |             |      |
| XaSt(C/Ha) | -0.07 | -0.11        | -0.11        | 0.05         | -0.05 | 0.00  | <b>0.37</b>  | <b>0.72</b>  | <b>0.42</b>  | 1.00         |              |             |              |             |      |
| XaSt (A.C) | -0.07 | -0.13        | -0.09        | 0.03         | -0.03 | 0.11  | <b>0.44</b>  | <b>0.59</b>  | <b>0.85</b>  | <b>0.69</b>  | 1.00         |             |              |             |      |
| XaSt(V/Ha) | -0.15 | 0.00         | 0.03         | -0.03        | 0.04  | 0.06  | -0.02        | 0.27         | 0.12         | <b>0.61</b>  | <b>0.41</b>  | 1.00        |              |             |      |
| XaSt(A.V)  | -0.20 | -0.15        | -0.06        | 0.01         | -0.01 | 0.21  | 0.30         | <b>0.39</b>  | <b>0.64</b>  | <b>0.67</b>  | <b>0.92</b>  | <b>0.54</b> | 1.00         |             |      |
| (H/)       | -0.03 | 0.04         | 0.00         | 0.02         | -0.02 | -0.11 | <b>-0.81</b> | <b>-0.37</b> | <b>-0.50</b> | -0.21        | <b>-0.36</b> | 0.20        | -0.23        | 1.00        |      |
| (J)        | -0.03 | 0.09         | 0.09         | -0.06        | 0.06  | -0.01 | <b>-0.70</b> | <b>-0.65</b> | <b>-0.67</b> | <b>-0.47</b> | <b>-0.55</b> | -0.09       | <b>-0.37</b> | <b>0.68</b> | 1.00 |

XaSt: *Xanthium Strumarium*, IVI: Importance value index, D/Ha: Density/hectare, A.D: Average density, C/Ha: Cover/ hectare, A.C: Average cover, V/Ha: Volume/hectare, A.V: Average volume, H: Shannon-Winner diversity index, J: Evenness index, Value in bold: significant at  $p < 0.0$

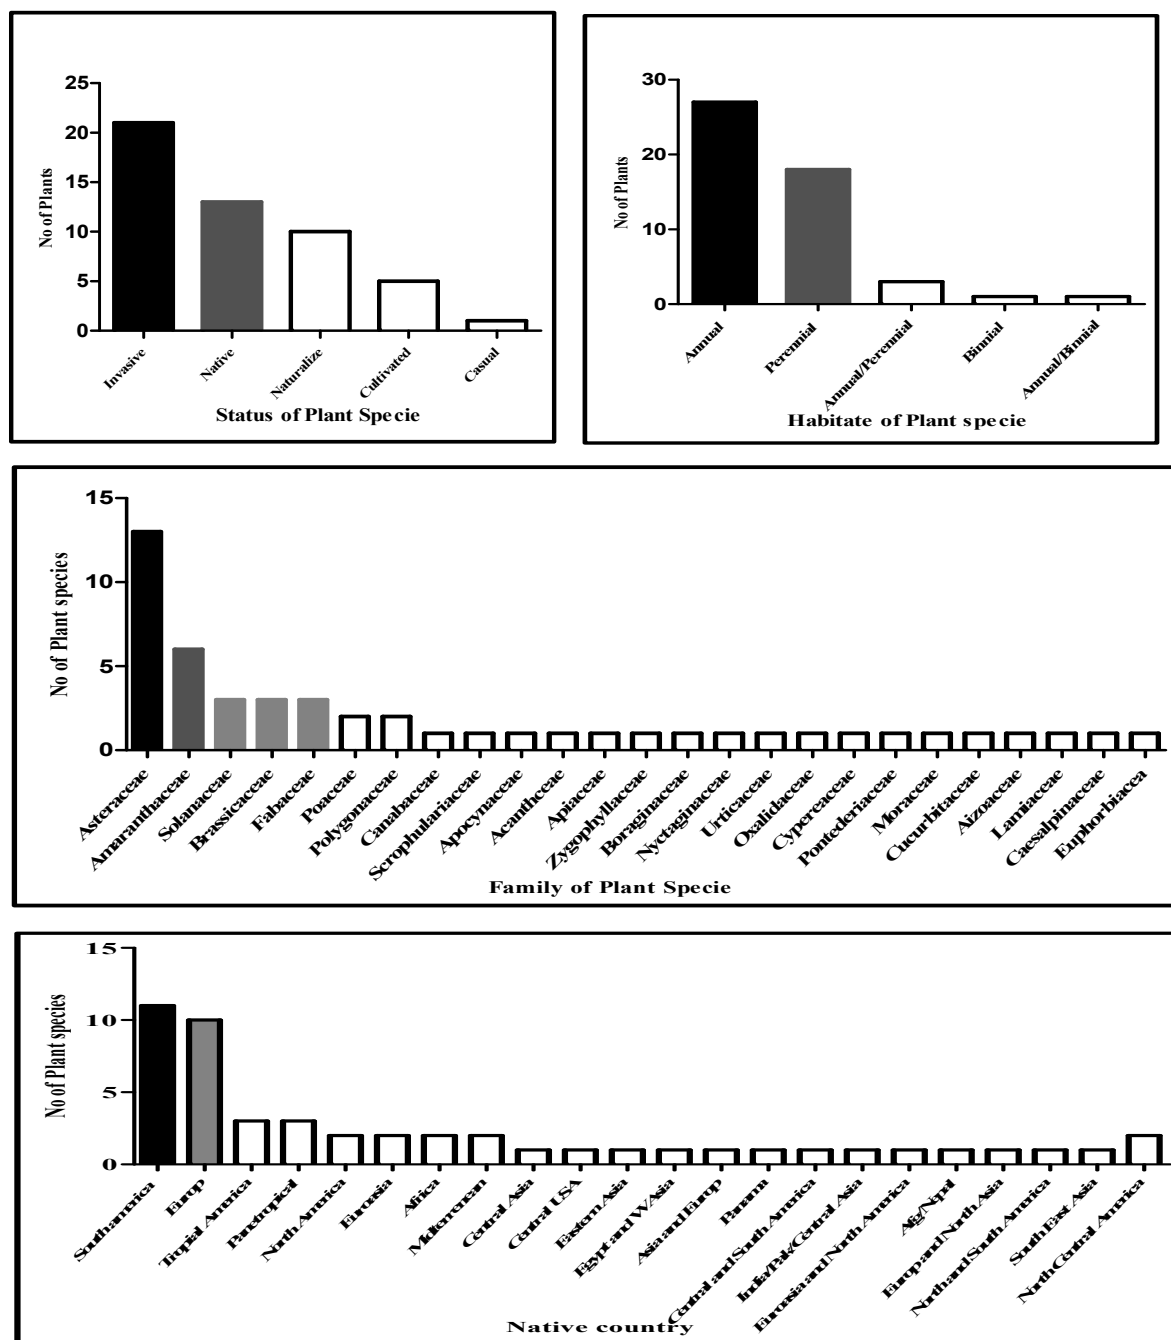

**Figure S1.** Status, Habitat, Family and Native country wise distribution of plants found in association in *Xanthium strumarium* dominated communities of KP Pakistan.
